# Supplementary material for: Cancer risk in relation to body fat distribution, evaluated by DXA-scans, in postmenopausal women – the Prospective Epidemiological Risk Factor (PERF) study
Source: PubMed Central journal article supplement (PMC6440966; doi:10.1038/s41598-019-41550-1), 2019-03-29
Supplement: 41598_2019_41550_MOESM1_ESM.pdf [file 41598_2019_41550_MOESM1_ESM.pdf]

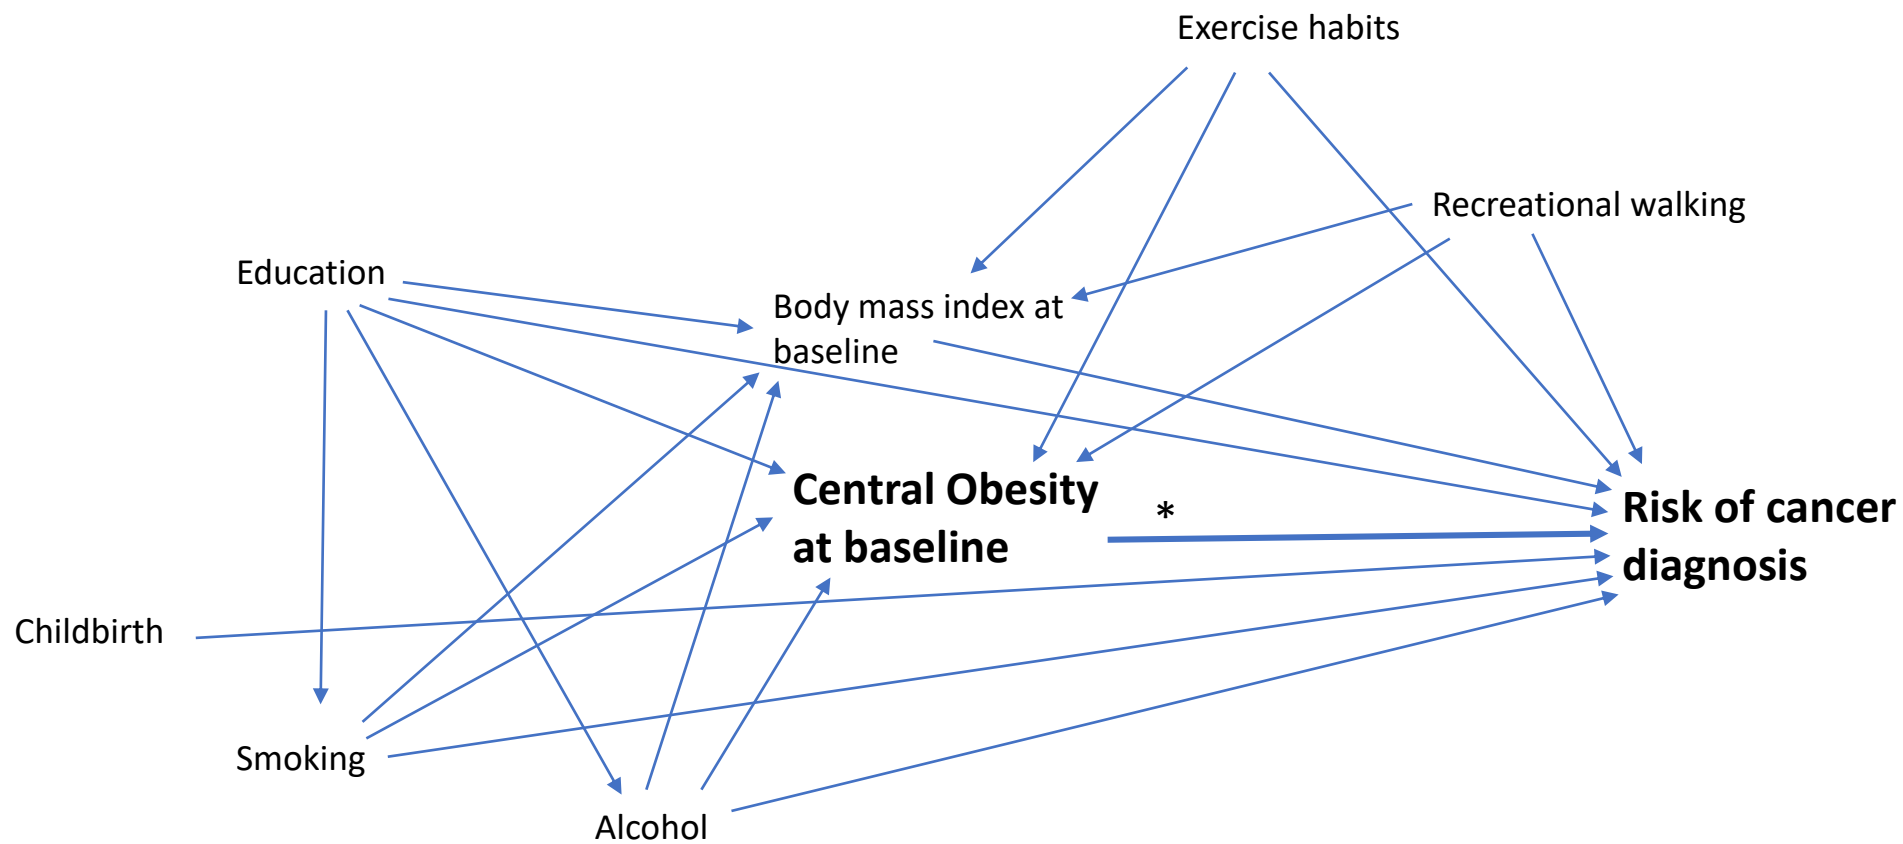

**Figure S1:** Directed acyclic graph (DAG) illustrating assumed causal structure underlying our adjusted Cox regression analysis.

*\*Causal path of interest*
